# Supplementary material
Source: PubMed Central journal article supplement (PMC9344795)
Supplement: mmc1.pdf [file mmc1.pdf]

## Supporting Information

ATP enhances the error-prone ribonucleotide incorporation by the SARS-CoV-2 RNA polymerase

Yasin Pourfarjam<sup>1,2</sup>, Zhijun Ma<sup>1</sup>, and In-Kwon Kim<sup>1,\*</sup>

From the <sup>1</sup>Department of Chemistry, University of Cincinnati, 301 Clifton Ct, Cincinnati, OH 45221, USA.

Running title: *ATP-dependent error-prone RNA replication by SARS-CoV-2*

<sup>2</sup>Present address: Human Oncology and Pathogenesis Program, Memorial Sloan Kettering Cancer, New York, NY 10065, USA.

\* To whom correspondence should be addressed: In-Kwon Kim, Department of Chemistry, University of Cincinnati, 301 Clifton Ct, Cincinnati, OH 45221, USA; E-mail: [kimiw@ucmail.uc.edu](mailto:kimiw@ucmail.uc.edu); Tel.: (513) 556-1909; Fax.: (513) 556-9239.

### Supporting information contents:

**Figure S1.** Purified SARS-CoV-2 nsp12, nsp7, and nsp8 proteins used in this study.

**Figure S2.** ATP-dependent low-fidelity nucleotide incorporation at [NTP] = 200  $\mu$ M, in the presence and absence of RNA proofreading nuclease.

**Figure S3.** ATP-dependent low-fidelity nucleotide incorporation at [NTP] = 2  $\mu$ M, in the presence and absence of RNA proofreading nuclease.

**Table S1.** RNA and DNA oligonucleotides used in this study.

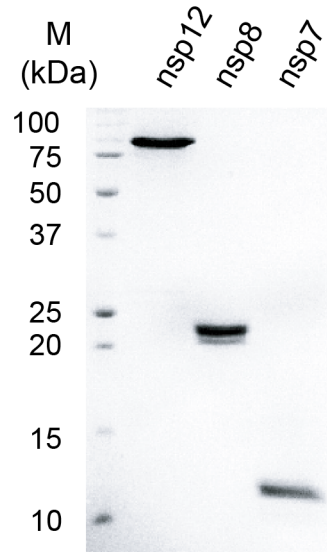

**Figure S1.** Purified SARS-CoV-2 nsp12, nsp7, and nsp8 proteins used in this study.

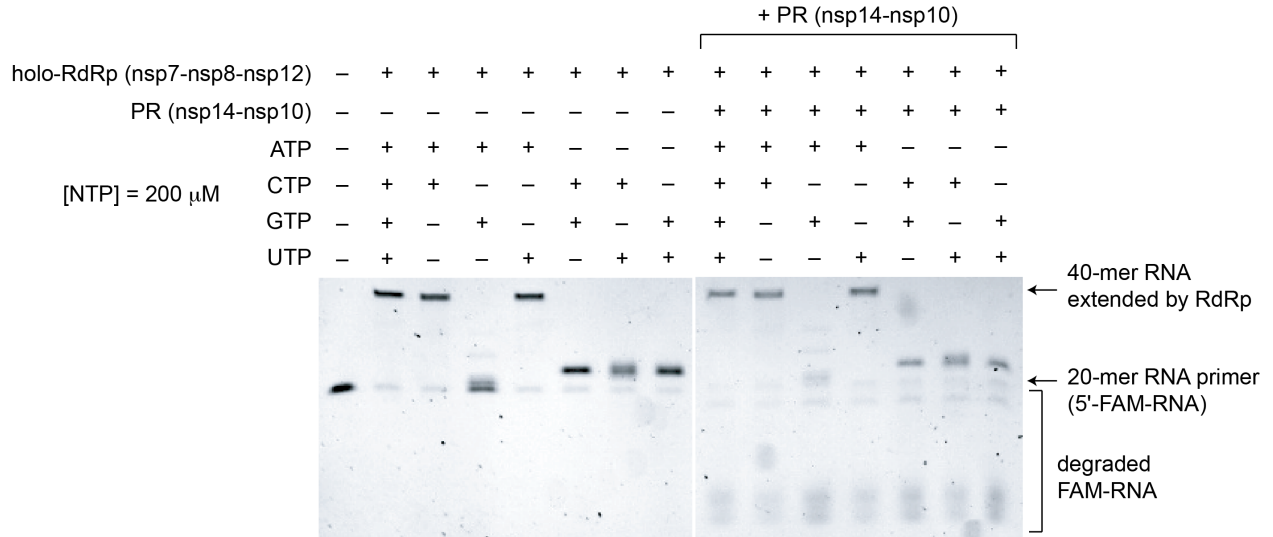

**Figure S2.** ATP-dependent low-fidelity nucleotide incorporation at [NTP] = 200  $\mu$ M, in the presence and absence of RNA proofreading nuclease. PR indicates proofreading nuclease (nsp14-nsp10).

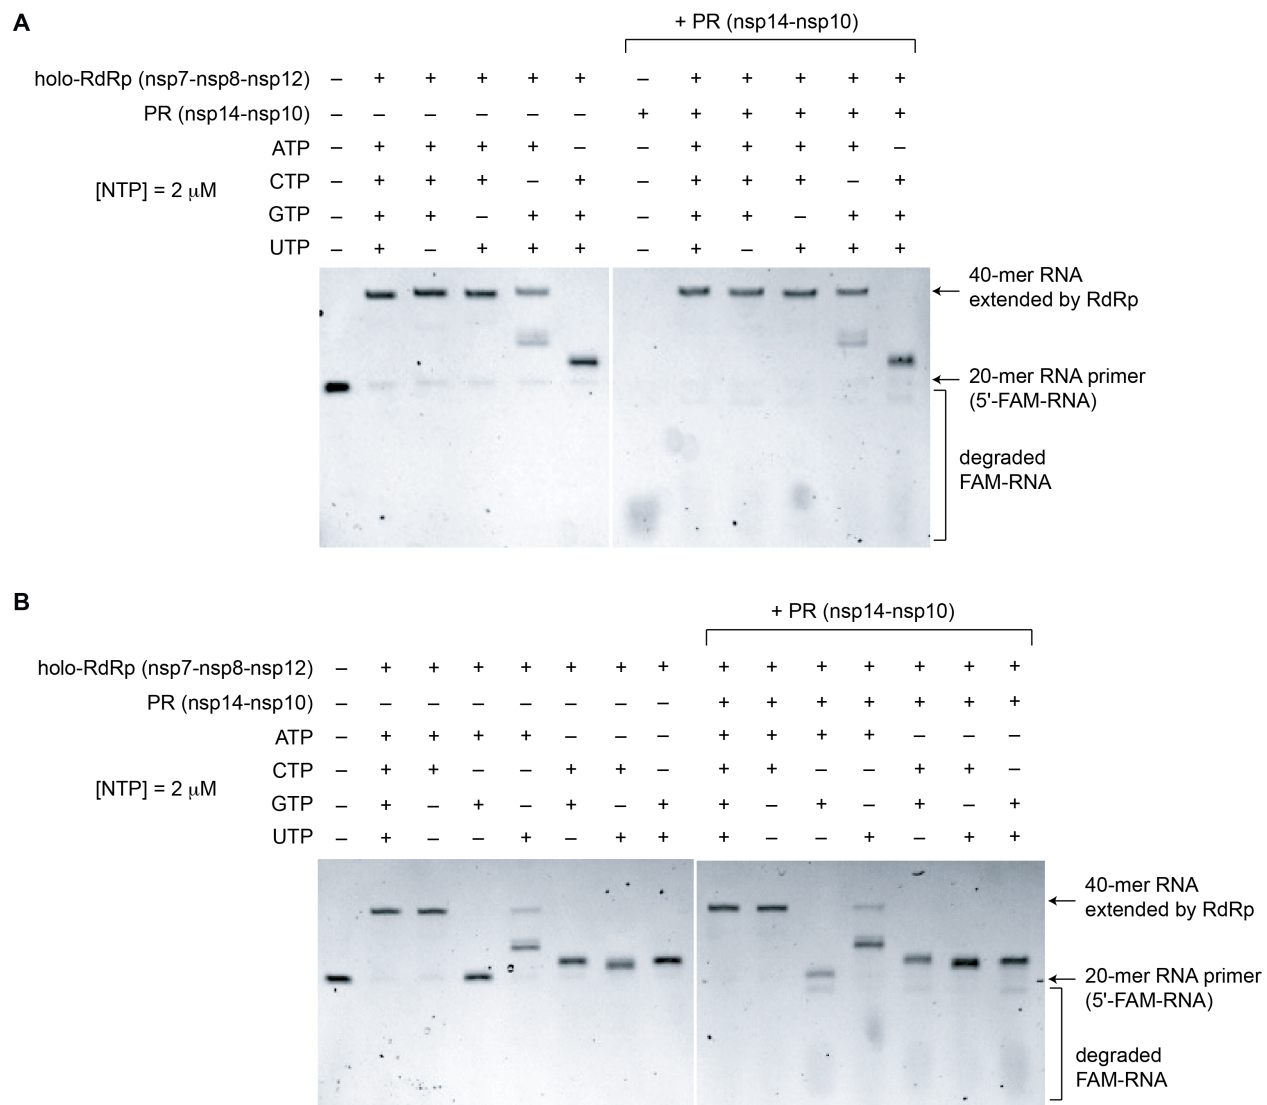

**Figure S3.** ATP-dependent low-fidelity nucleotide incorporation at [NTP] = 2  $\mu$ M, in the presence and absence of RNA proofreading nuclease. PR indicates proofreading nuclease (nsp14-nsp10).

**Table S1.** RNA and DNA oligonucleotides used in this study.

| <b>Oligo name</b>       | <b>Sequence 5' → 3'</b>                        |
|-------------------------|------------------------------------------------|
| 5'-FAM-20mer-RNA primer | 5'-FAM-GUCAUUCUCCUAAGAAGCUA-3'                 |
| 40mer-RNA template      | 5'-CUAUCCCCAUGUGAUUUUAAUAGCUUCUUAGGAGAAUGAC-3' |
| 5'-FAM-20mer-DNA primer | 5'-FAM-GTCATTCTCCTAAGAAGCTA-3'                 |
| 40mer-DNA template      | 5'-CTATCCCCATGTGATTTTAATAGCTTCTTAGGAGAATGAC-3' |
